# Supplementary material for: CHK1 inhibitor induced PARylation by targeting PARG causes excessive replication and metabolic stress and overcomes chemoresistance in ovarian cancer
Source: PubMed Central journal article supplement (PMC11166985; doi:10.1038/s41420-024-02040-0), 2024-06-11

Original PARylation and GAPDH blots for Figure 1 (OVCAR8 cells)

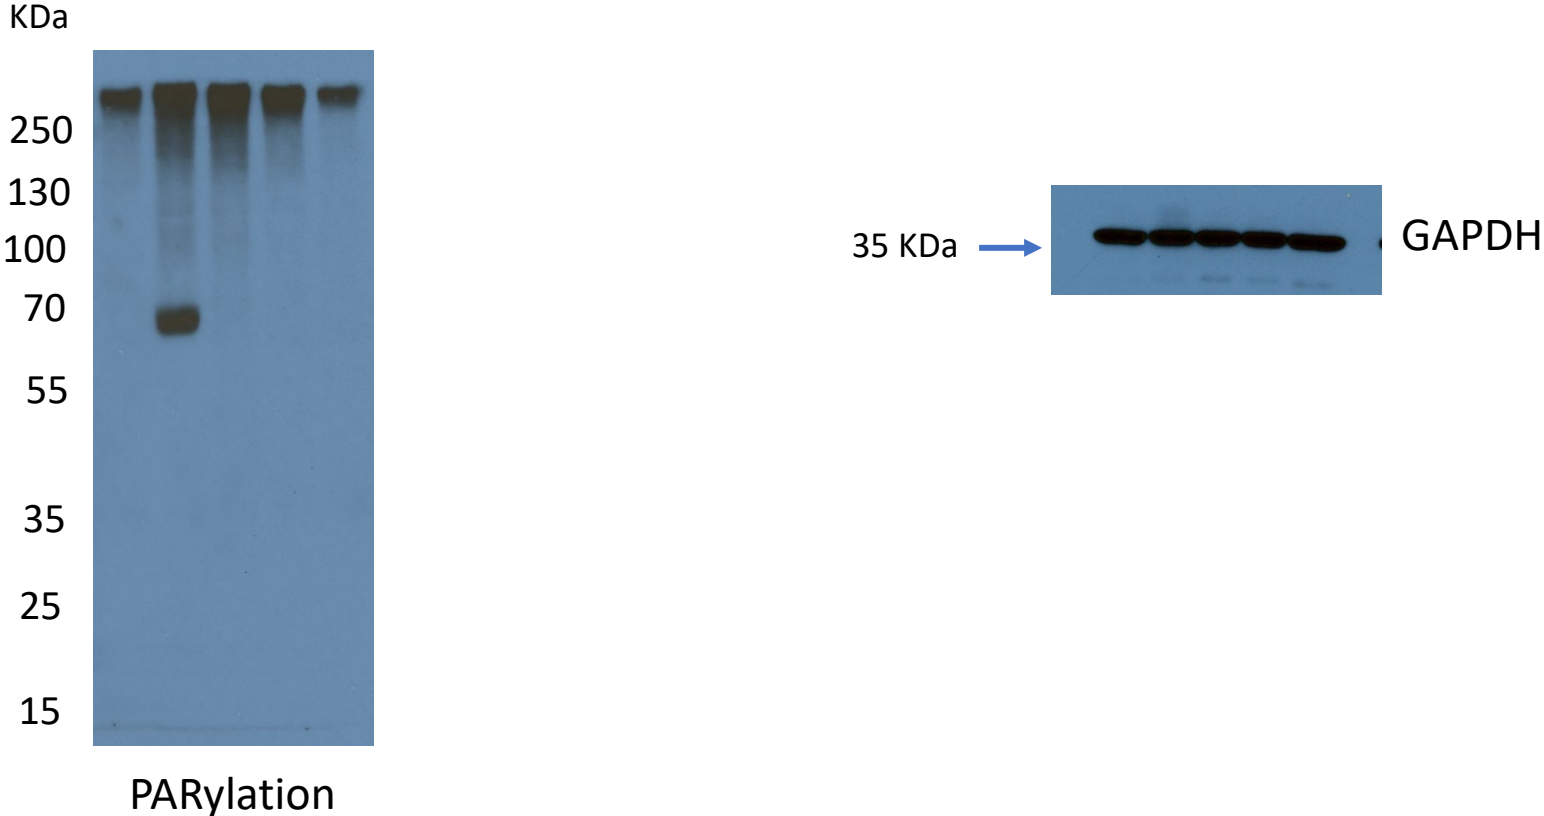

Original PARylation and GAPDH blots for Figure 1 (SKOV3 cells)

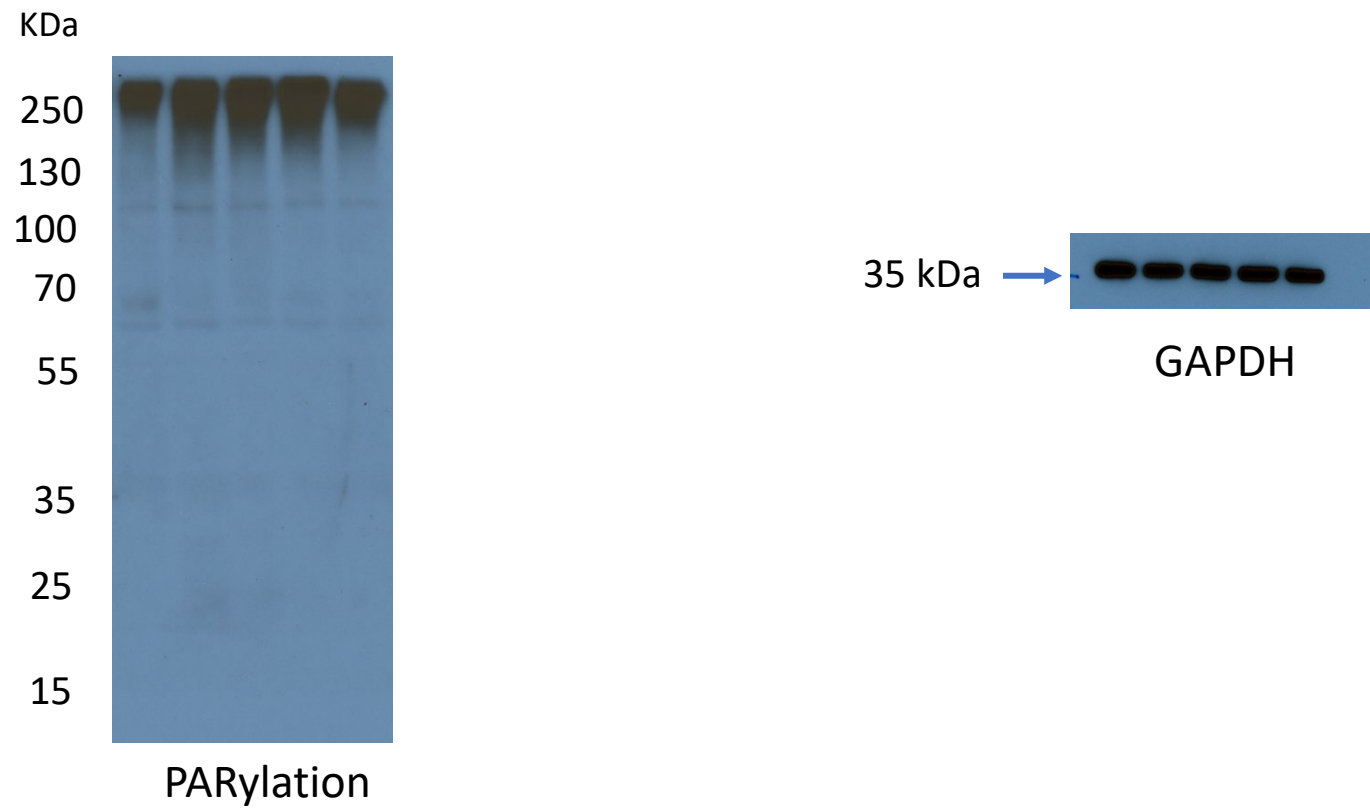

Original blots for phosphorylation of CHK1 and GAPDH for Figure 2A,B  
(First column for OVCAR8 and other for SKOV3)

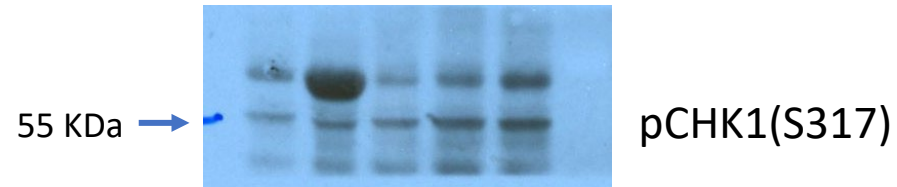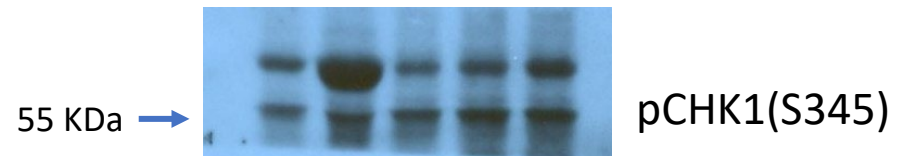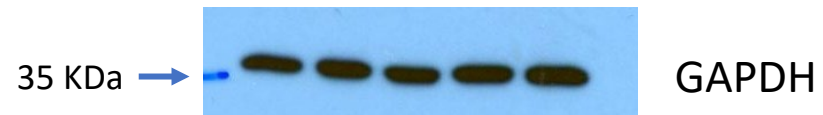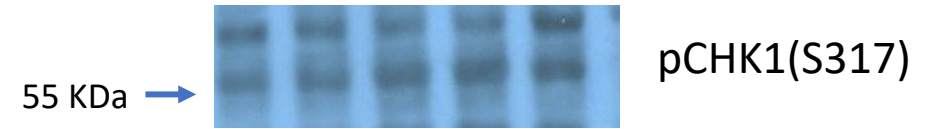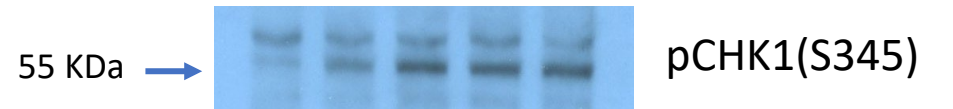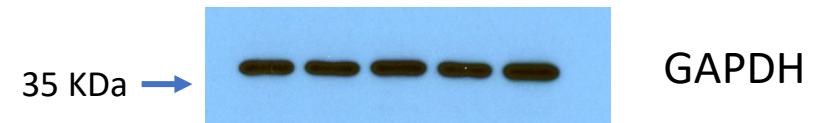

Original PARylation and GAPDH blots for Figure 2C  
(First 4 lanes for OVCAR8 and other 4 lanes for SKOV3)

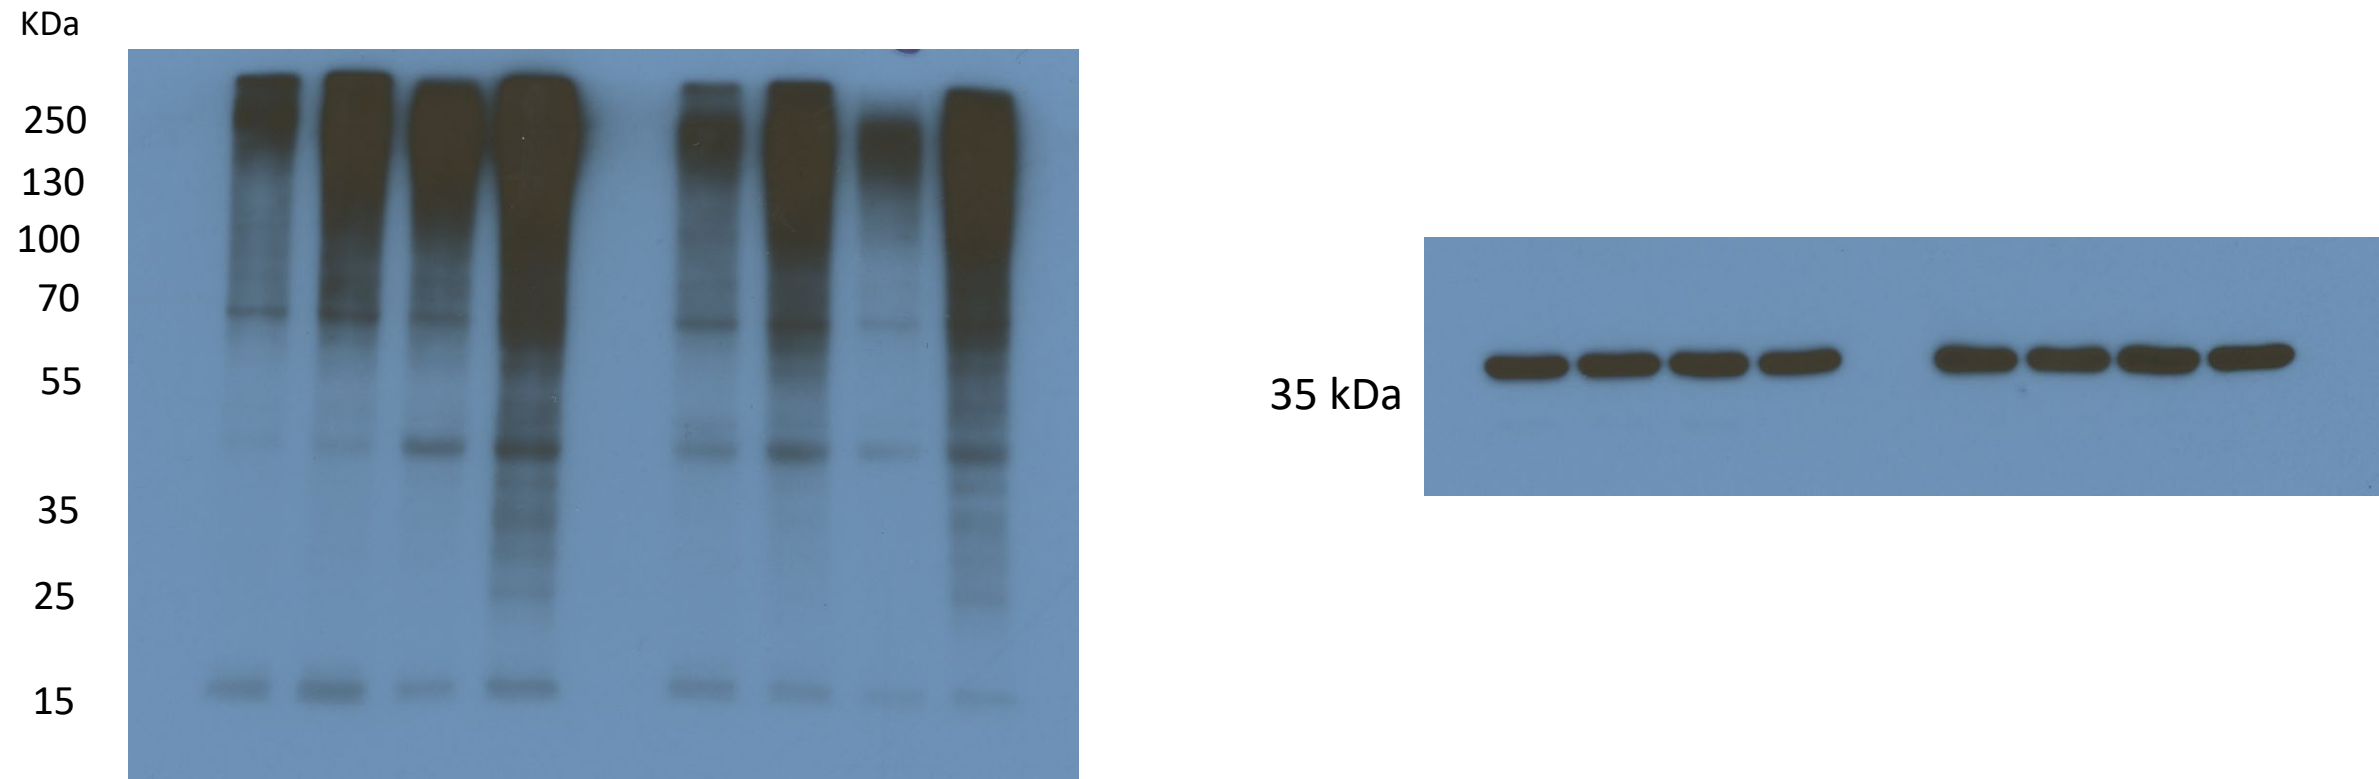

Original blots for phosphorylation of CHK1 and GAPDH for Figure 2D  
(First 4 lanes for OVCAR8 and other 4 lanes for SKOV3)

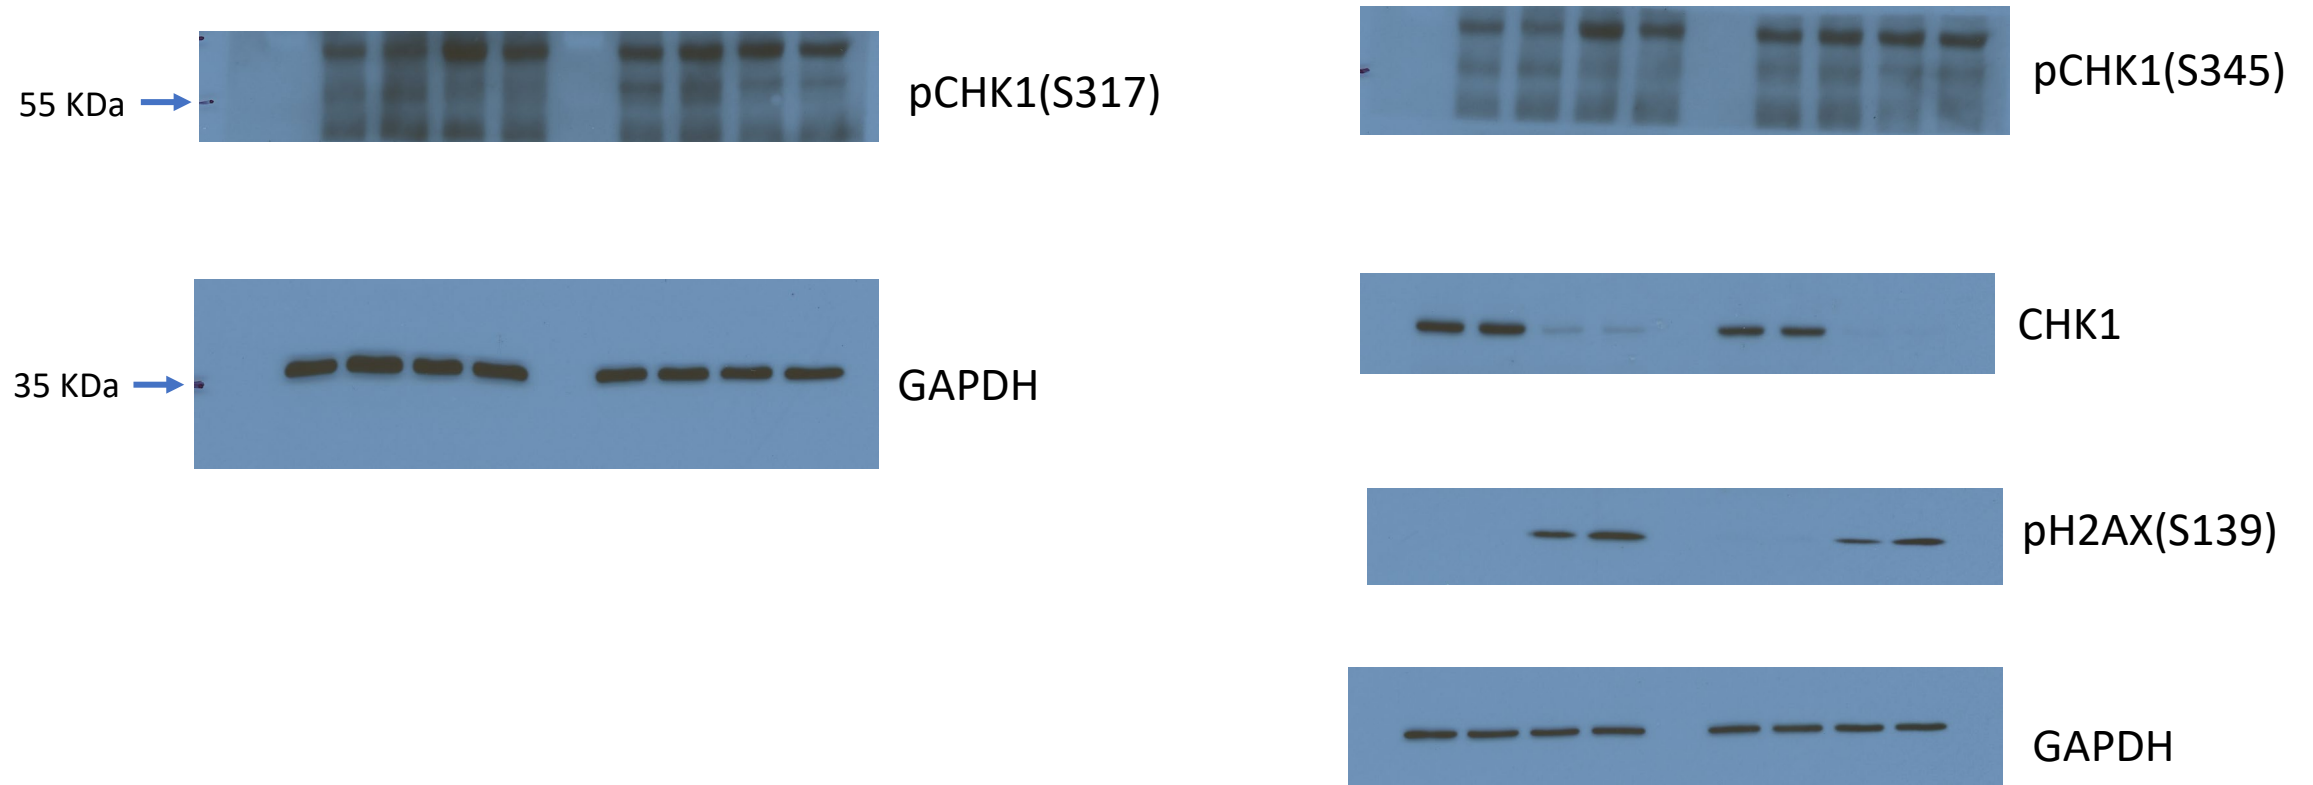

Original PARylation and GAPDH blots for Figure 4A  
(First 4 lanes for OVCAR8 and other 4 lanes for SKOV3)

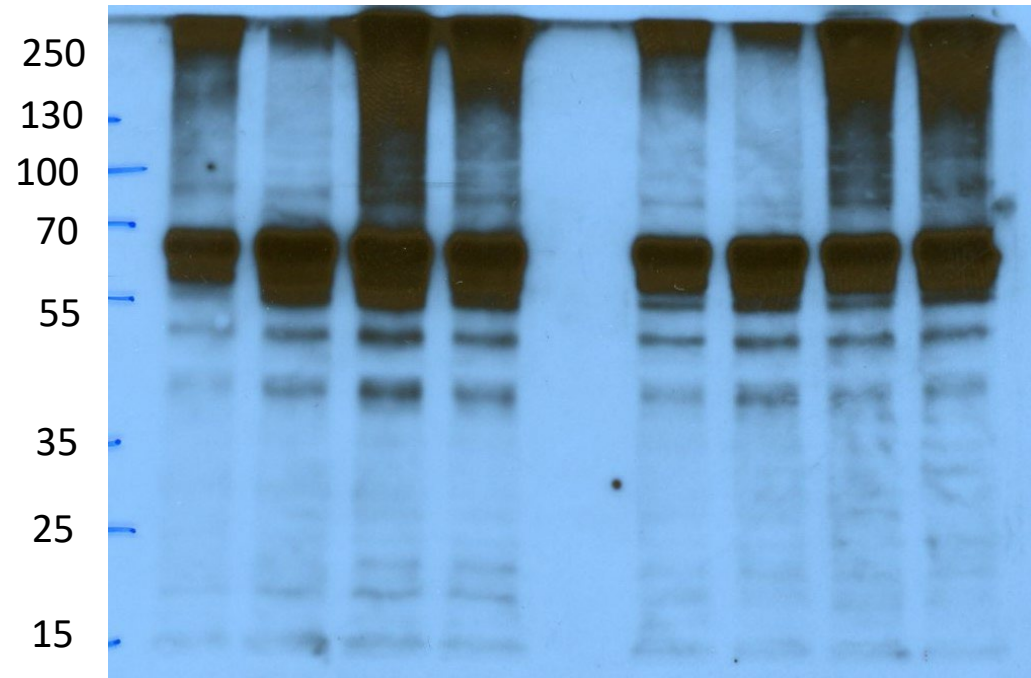

PARylation

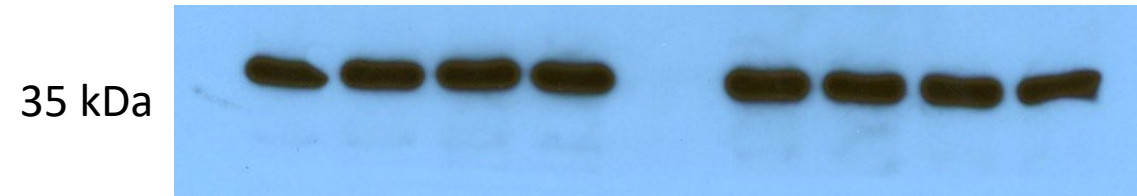

GAPDH

Original blots for pCHK1(S296), CHK1 & pH2AX(S139) for Figure 4A  
(First 4 lanes for OVCAR8 and other 4 lanes for SKOV3)

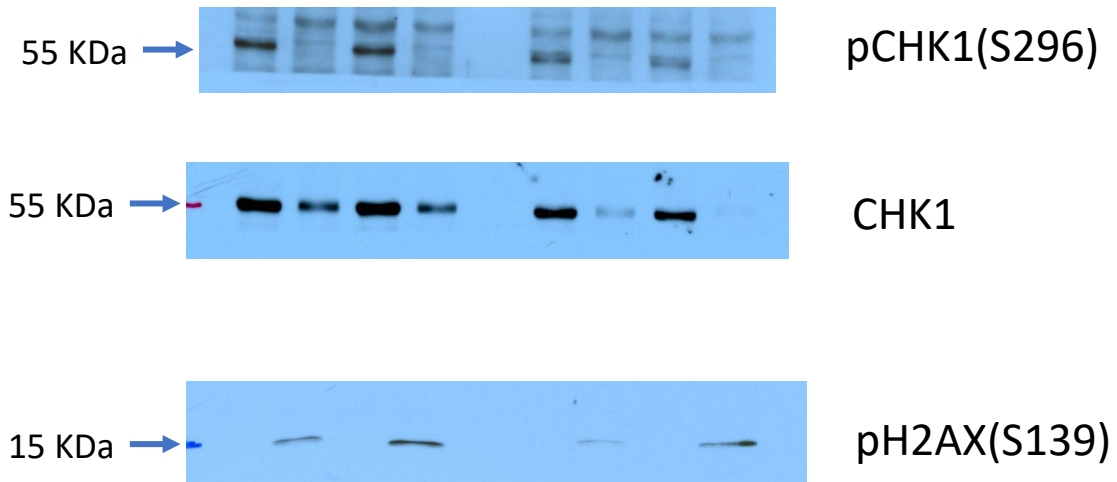

Original blots for pRPA32(S33) for Figure 4B  
(SKOV3)

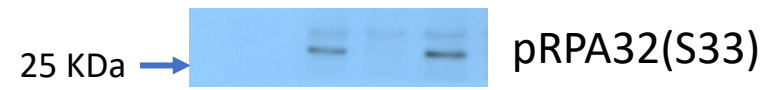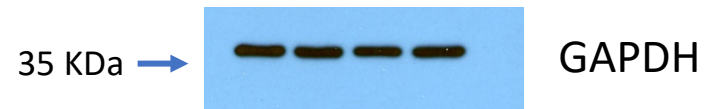



Original blots for pCHK1(S296), CHK1, pRPA32(S33), pH2AX(S139) and GAPDH for Figure 8C  
(First 4 lanes for A2780 and other 4 lanes for A2780/CP70)

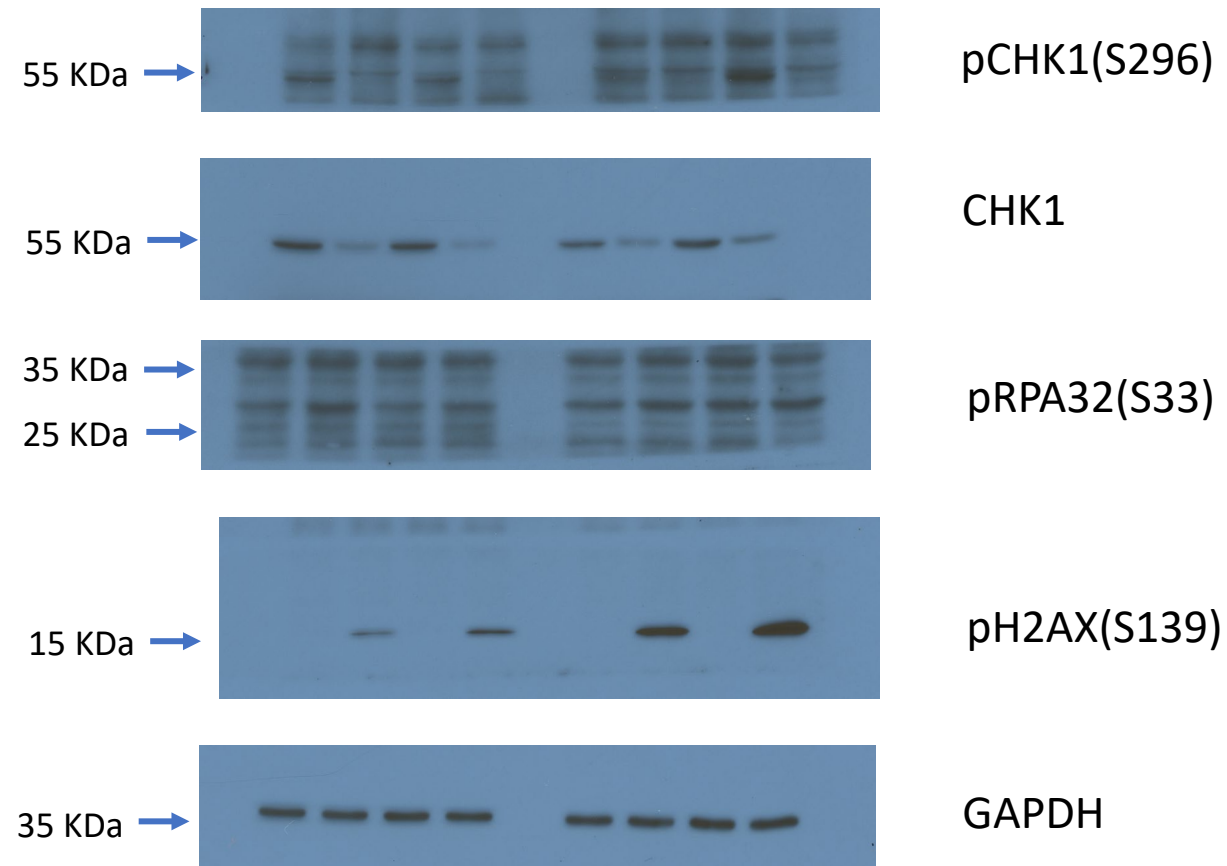

Original blots for ALDH1A1 and GAPDH for Figure 9

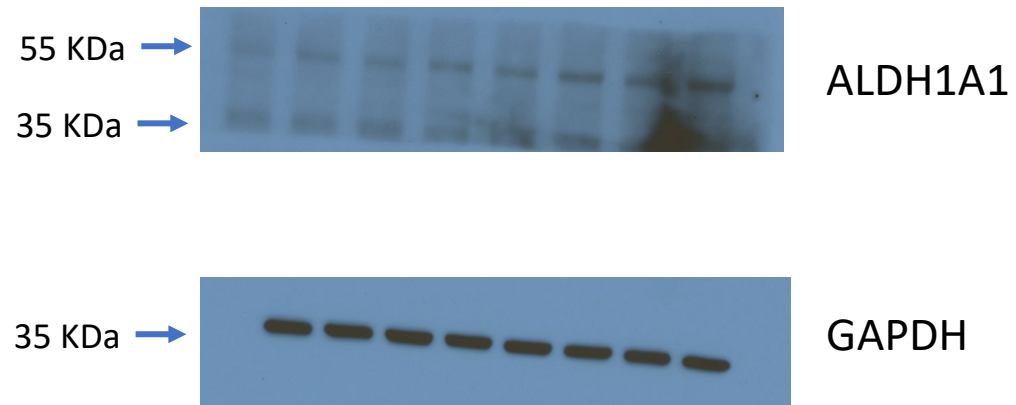

Supplement: 41420_2024_2040_MOESM2_ESM.pdf [file 41420_2024_2040_MOESM2_ESM.pdf]
